# Supplementary material
Source: Springer Nature journal article supplement (https://www.springermedizin.de/resource/supplementary/12936_2013_2867_MOESM1_ESM.pdf/9544484)
Supplement: MOESM1 [file 9544484]

Additional File 1:

**Table 2:** Results for mean number of ITN users

| Country     | Location<br>(Region, State or District) | Year | Mean users | 95% Confidence Interval for mean users | Mean users if not 1 ITN per 2 people | Mean users if 1 ITN per 2 people |
|-------------|-----------------------------------------|------|------------|----------------------------------------|--------------------------------------|----------------------------------|
| Ghana       | Northern                                | 2010 | 2.15       | 2.07 to 2.23                           | 2.24                                 | 1.81                             |
| Ghana       | Central                                 | 2012 | 2.06       | 1.96 to 2.14                           | 2.33                                 | 1.75                             |
| Ghana       | Western                                 | 2012 | 1.99       | 1.89 to 2.09                           | 2.47                                 | 1.75                             |
| Ghana       | Eastern                                 | 2012 | 1.74       | 1.68 to 1.80                           | 2.13                                 | 1.51                             |
| Ghana       | Brong Ahafo                             | 2012 | 1.87       | 1.80 to 1.93                           | 2.49                                 | 1.75                             |
| Liberia     | National                                | 2009 | 2.24       | 2.19 to 2.29                           | 2.40                                 | 1.73                             |
| Liberia     | National                                | 2011 | 2.35       | 2.29 to 2.41                           | 2.69                                 | 1.66                             |
| Malawi      | National                                | 2012 | 2.26       | 2.21 to 2.32                           | 2.85                                 | 1.87                             |
| Madagascar  | National                                | 2011 | 2.47       | 2.42 to 2.53                           | 2.68                                 | 1.68                             |
| Mozambique  | National                                | 2007 | 2.10       | 2.04 to 2.23                           | 2.32                                 | 1.61                             |
| Mozambique  | Regional*                               | 2010 | 2.14       | 2.04 to 2.23                           | 2.44                                 | 1.94                             |
| Nigeria     | Kano                                    | 2009 | 1.87       | 1.76 to 1.99                           | 2.19                                 | 1.63                             |
| Nigeria     | Anambra                                 | 2009 | 2.15       | 1.63 to 1.80                           | 2.61                                 | 1.66                             |
| Nigeria     | National                                | 2010 | 1.71       | 1.89 to 1.98                           | 2.37                                 | 1.76                             |
| Nigeria     | Niger                                   | 2010 | 1.94       | 1.82 to 2.07                           | 2.17                                 | 1.54                             |
| Nigeria     | Ogun                                    | 2010 | 1.95       | 1.84 to 2.25                           | 2.09                                 | 1.69                             |
| Nigeria     | Sokoto                                  | 2010 | 2.04       | 1.84 to 2.25                           | 2.11                                 | 1.97                             |
| Nigeria     | Katsina                                 | 2010 | 2.07       | 1.98 to 2.15                           | 1.83                                 | 1.66                             |
| Nigeria     | Nasarawa                                | 2011 | 1.81       | 1.70 to 1.92                           | 2.21                                 | 1.66                             |
| Nigeria     | Cross River                             | 2011 | 1.95       | 1.89 to 2.00                           | 2.00                                 | 1.55                             |
| Senegal     | National                                | 2006 | 2.03       | 1.98 to 2.08                           | 2.17                                 | 1.64                             |
| Senegal     | National                                | 2008 | 1.98       | 1.95 to 2.01                           | 2.15                                 | 1.60                             |
| Senegal     | National                                | 2011 | 1.83       | 1.80 to 1.87                           | 2.03                                 | 1.65                             |
| South Sudan | Lainya                                  | 2011 | 1.77       | 1.63 to 1.90                           | 1.87                                 | 1.62                             |
| Tanzania    | National                                | 2004 | 2.00       | 1.96 to 2.04                           | 2.39                                 | 1.64                             |
| Tanzania    | National                                | 2007 | 2.05       | 2.01 to 2.08                           | 2.45                                 | 1.69                             |
| Tanzania    | National                                | 2010 | 2.09       | 2.06 to 2.12                           | 2.44                                 | 1.74                             |
| Tanzania    | National                                | 2011 | 2.00       | 1.97 to 2.02                           | 2.43                                 | 1.76                             |
| Uganda      | National                                | 2006 | 1.79       | 1.74 to 1.83                           | 2.10                                 | 1.43                             |
| Uganda      | West                                    | 2009 | 1.81       | 1.76 to 1.86                           | 2.11                                 | 1.49                             |
| Uganda      | National                                | 2009 | 1.87       | 1.80 to 1.95                           | 2.04                                 | 1.50                             |
| Uganda      | Kamuli                                  | 2010 | 1.81       | 1.71 to 1.91                           | 2.16                                 | 1.90                             |
| Uganda      | West                                    | 2010 | 2.00       | 1.95 to 2.04                           | 2.48                                 | 1.67                             |
| Uganda      | National                                | 2011 | 1.92       | 1.89 to 1.96                           | 2.11                                 | 1.55                             |
| Uganda      | West                                    | 2011 | 1.79       | 1.76 to 1.82                           | 2.15                                 | 1.64                             |

\* Provinces Inhambane, Nampula, Cabo Delgado
